# Supplementary material for: Movable triple points and Dirac points in centrosymmetric AB2 (A = Cr, Mo; B = Si, Ge) compounds
Source: Royal Society of Chemistry journal article supplement (doi:10.1039/d2cp03297j), 2022-01-01
Supplement: d2cp03297j1.pdf [file d2cp03297j1.pdf]

## Supplemental Materials

### Movable triple points and Dirac points in centrosymmetric AB<sub>2</sub> (A=Cr, Mo; B=Si, Ge) compounds

Yu Zhang,<sup>a,b</sup> Xuefang Dai,<sup>a,b\*</sup> Tingli He<sup>a,b</sup>, Wei Liu,<sup>a,b</sup> Lirong Wang,<sup>a,b</sup> Weiwang Yu,<sup>a,b</sup> Long Xu,<sup>a,b</sup> Ying Liu,<sup>a,b</sup> Xiaoming Zhang,<sup>a,b</sup> and Guodong Liu<sup>a,b\*</sup>

<sup>a</sup>State Key Laboratory of Reliability and Intelligence of Electrical Equipment, Hebei University of Technology, Tianjin 300130, China.

<sup>b</sup>School of Materials Science and Engineering, Hebei University of Technology, Tianjin 300130, China

E-mail: xuefangdai@126.com; [gdlu1978@126.com](mailto:gdlu1978@126.com)

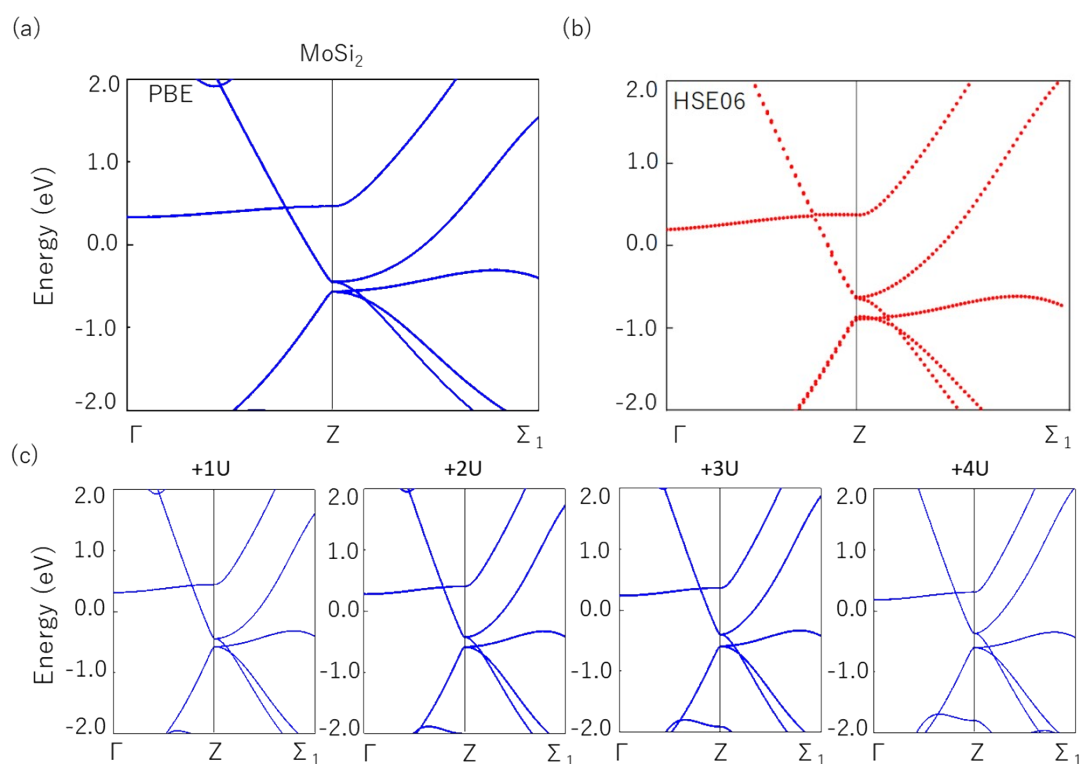

Figure S1. Electric band structure of MoSi<sub>2</sub> without SOC calculated by PBE (a), HSE (b) and PBE+U (c).
